# Supplementary figures and images for: Screening of Escherichia coli Species Biodiversity Reveals New Biofilm-Associated Antiadhesion Polysaccharides
Source: PubMed Central journal article supplement — mBio. 2011 May 10;2(3):e00043-11. doi: 10.1128/mBio.00043-11 (PMC3101779; doi:10.1128/mbio.00043-11), 2011-05-10

A

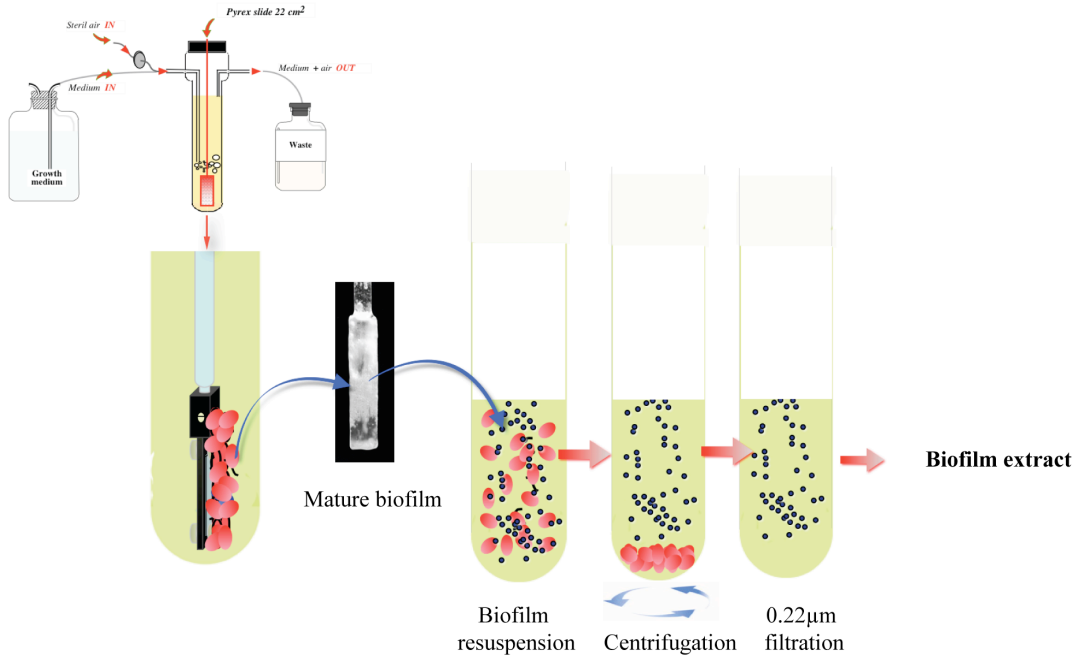

B

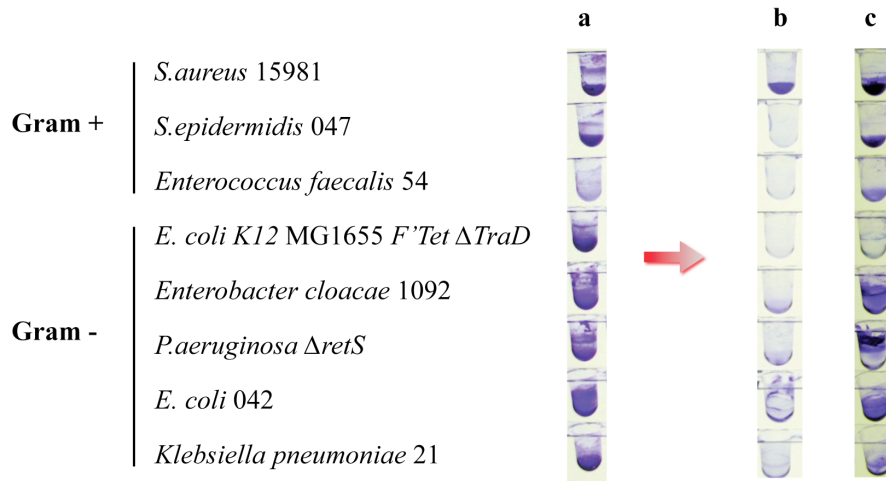

Supplement: mBio.00043-11-sf01.pdf [file mBio.00043-11-sf01.pdf]

1

**A**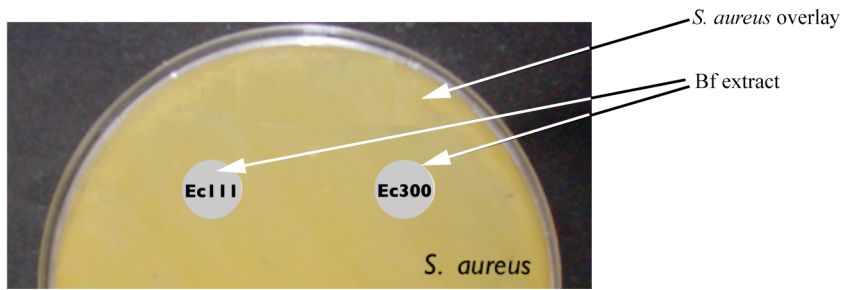**B**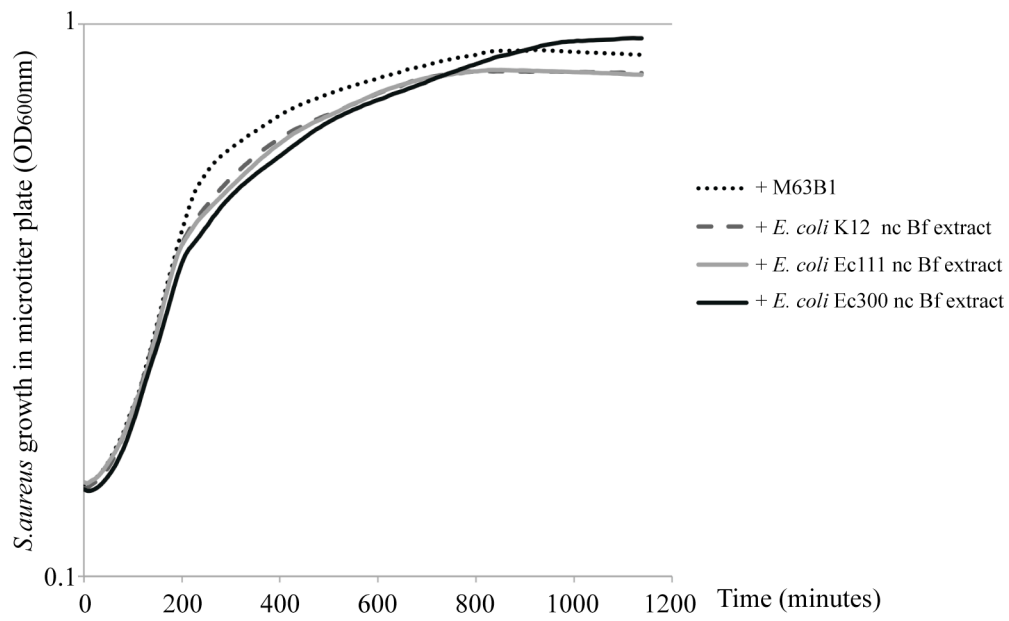

Supplement: mBio.00043-11-sf02.pdf [file mBio.00043-11-sf02.pdf]

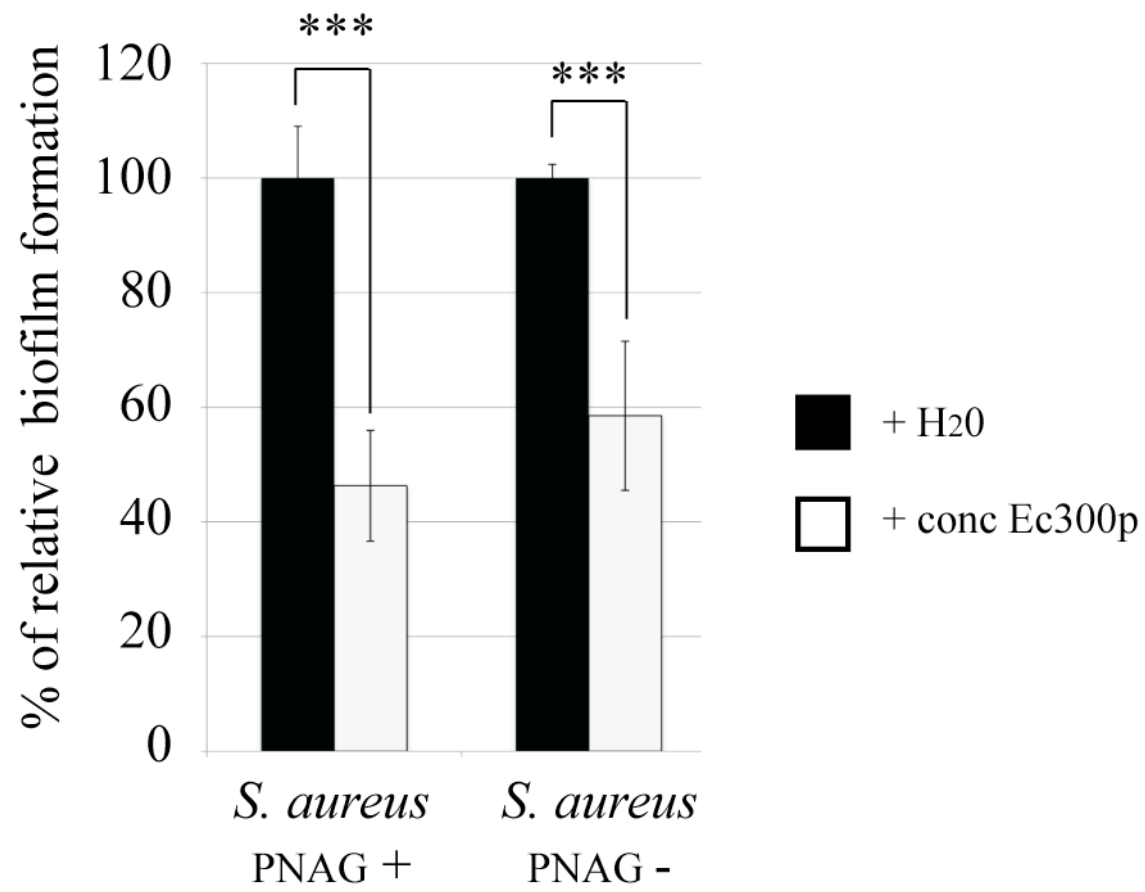

Supplement: mBio.00043-11-sf03.pdf [file mBio.00043-11-sf03.pdf]

1

**A**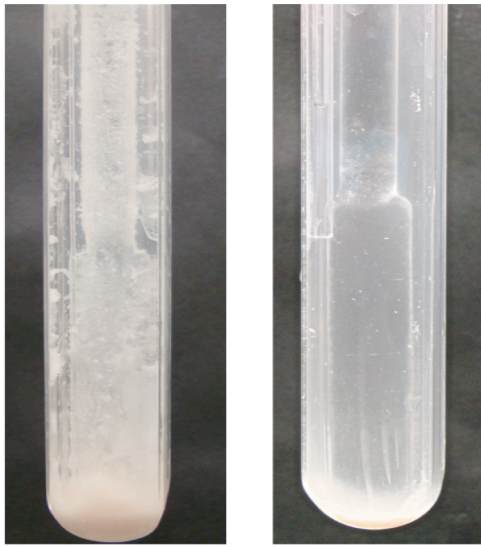

Ec300

Ec300  $\Delta galF-hisE$ **B**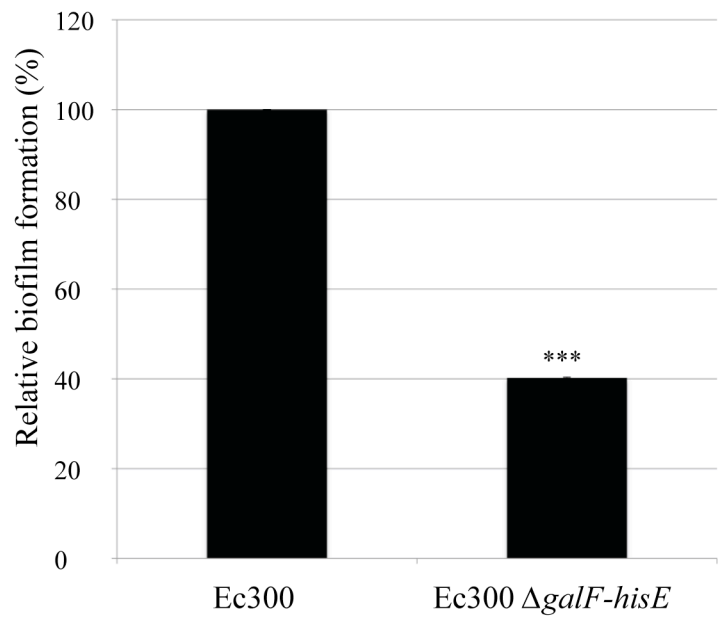

Supplement: mBio.00043-11-sf04.pdf [file mBio.00043-11-sf04.pdf]

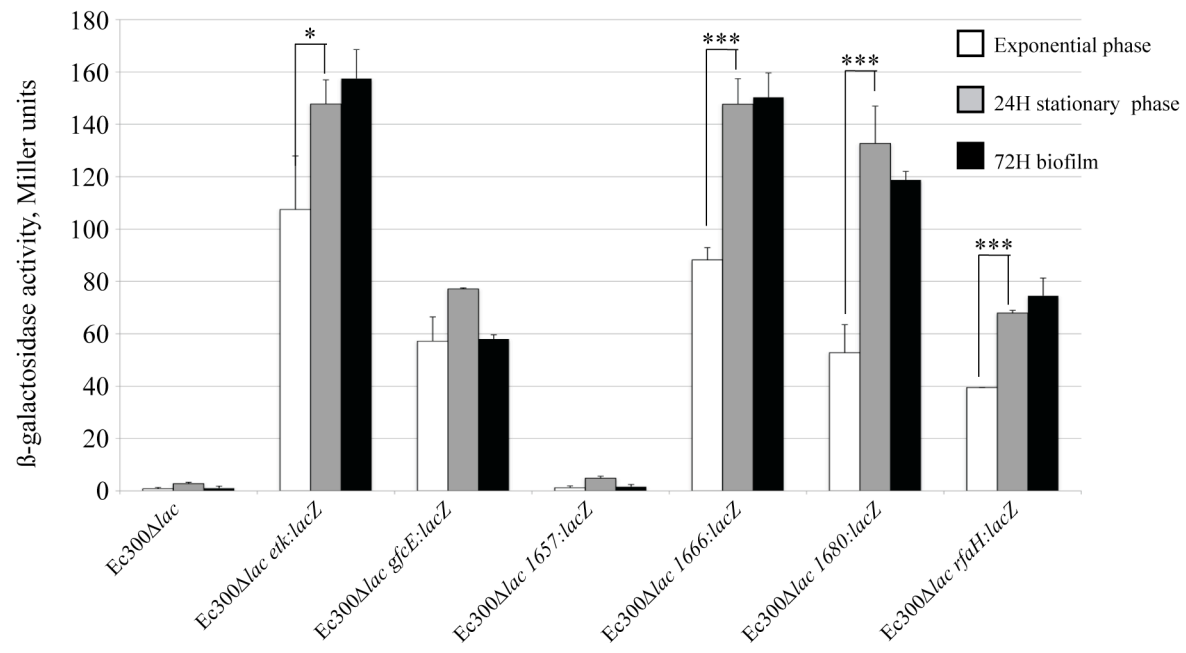

Supplement: mBio.00043-11-sf05.pdf [file mBio.00043-11-sf05.pdf]

1

**A**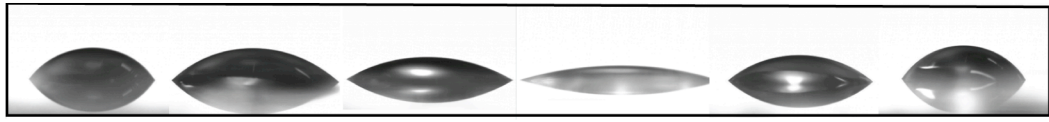**B**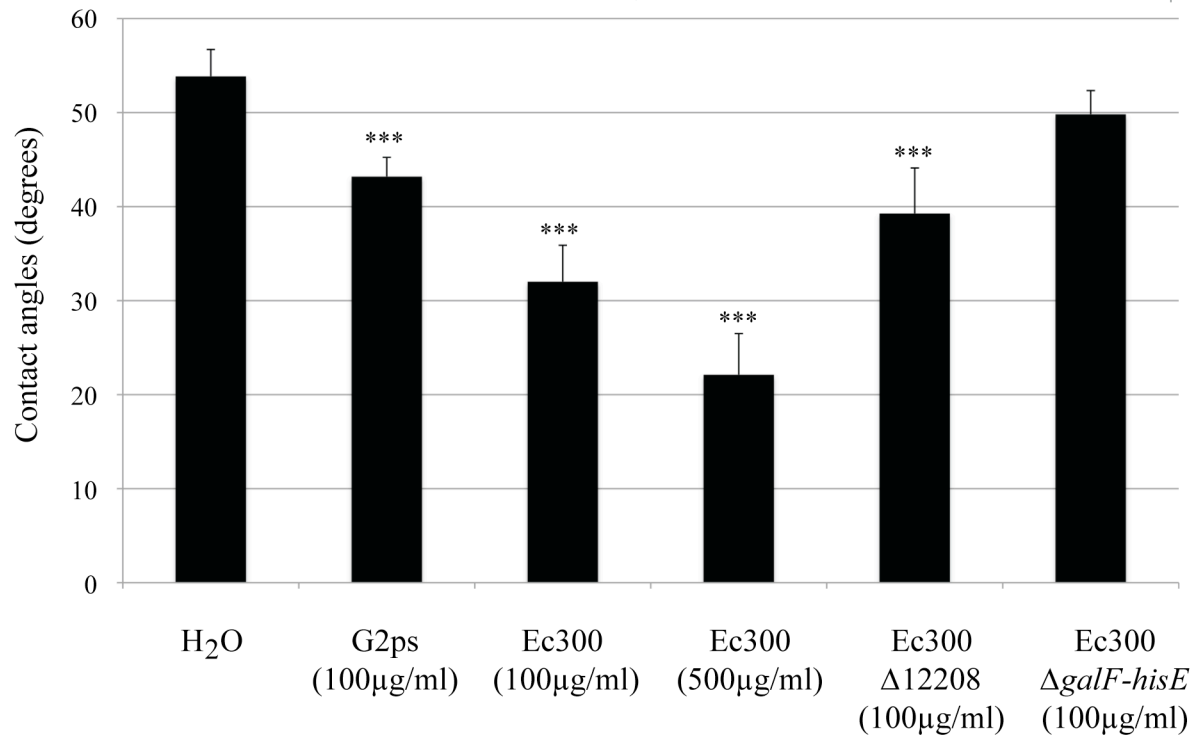

Supplement: mBio.00043-11-sf06.pdf [file mBio.00043-11-sf06.pdf]
